# Supplementary material for: Dissecting transcription regulatory pathways through a new bacterial one-hybrid reporter system
Source: HighWire-hosted journal article supplement (doi:10.1101/gr.086595.108), 2009-02-18
Supplement: Supp_Fig.1.pdf [file Supp_Fig.1.pdf]

**Figure 1**

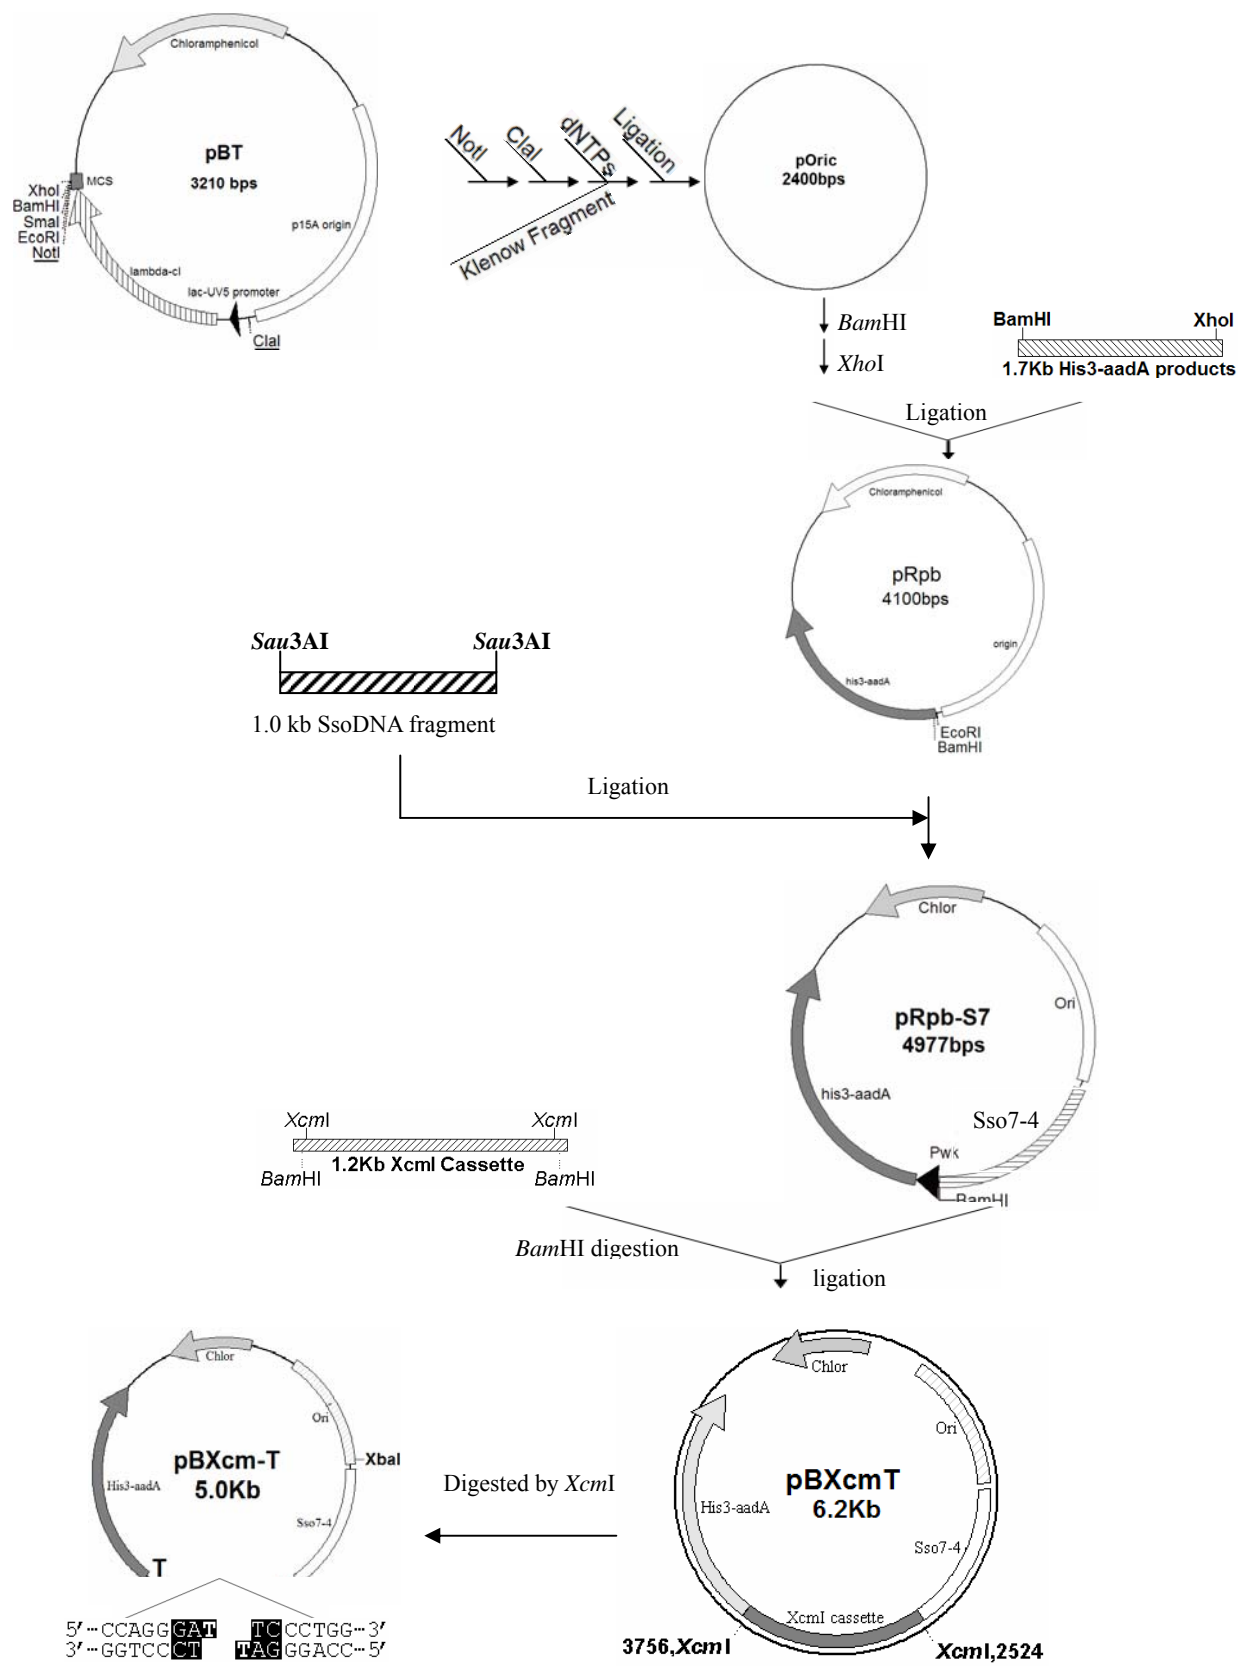

**A routine of preparation of the *XcmI* cassette and plasmid pBXcmT.** The reporter vector pBXcmT was derived from the bait plasmid pBT of BacterioMatch@ II two-hybrid system (Stratagene). For developing a new bacterial one-hybrid (B1H) reporter vector, an approximately 1.7 kb DNA fragment containing the *His3-aadA* reporter cassette was cloned from the BacterioMatch@ II two-hybrid reporter system (Stratagene) using a pair of unique primers (Suppl. Table S1). This reporter cassette was further used to replace  $\lambda$ CI and lac-UV5 promoters from pBT to produce a preliminary vector named pRpb. In order to restrain the self-activation and reduce screening background, a mediator DNA fragment was successfully screened from the genomic library of the archaeon *S. solfataricus* and the fragment was inserted into the right upstream of the *His3-aadA* reporter cassette. After further modifications, a derivative reporter vector of pRpb-S7 was produced, in which a BamHI restriction enzyme site was integrated into the upstream of the *His3-aadA* reporter cassette. For the convenient and rapid cloning of the short promoter DNA fragment into the one-hybrid system, we further engineered a 1.2 kb MCM $\Delta$  segment containing two *XcmI* sites in both its termini, the *XcmI* Cassette. The cassette was derived from the mini-chromosome maintenance gene (MCM) of the archaeon *S. solfataricus* which was amplified by using a pair of specific primers containing the *XcmI* site (Suppl. Table 1). The *XcmI* Cassette was inserted into *Bam*HI-digested pRpb-S7 to produce a plasmid pBXcmT. When digested with *XcmI*, the recombinant plasmid pBXcmT resulted in a vector with a single deoxythymidine (dT) overhang at its 3'-end. This linearized T-vector could then be used for the rapid cloning of PCR products.
