# Supplementary material for: Dissecting transcription regulatory pathways through a new bacterial one-hybrid reporter system
Source: HighWire-hosted journal article supplement (doi:10.1101/gr.086595.108), 2009-02-18
Supplement: Supp_Fig_2.pdf [file Supp_Fig_2.pdf]

| Transcription regulatory factors | Target gene or gene cluster |
|----------------------------------|-----------------------------|
|----------------------------------|-----------------------------|

### Target gene or gene cluster

**Detection of novel transcription factors for the expression of stress response genes by one-hybrid system.** The promoters of stress response genes were cloned in pBXcm-T and used to screen the *M. tuberculosis* sub-genome library according to the description given in *Materials and Methods*. The potential regulators which interact with the promoters were isolated from the library and listed on the left. Rv3416 (WhiB3) was underlined. The structures of stress response gene or gene cluster were listed on the right, respectively.
