# Supplementary material for: Dissecting transcription regulatory pathways through a new bacterial one-hybrid reporter system
Source: HighWire-hosted journal article supplement (doi:10.1101/gr.086595.108), 2009-02-18
Supplement: Supp_Fig_3.pdf [file Supp_Fig_3.pdf]

**Figure 3**

**Transcription regulatory factors**

Rv0445(SigK), Rv2034, Rv3416(WhiB3),  
Rv3744

Rv2017, Rv2710(SigB), Rv3133c(DevR),  
Rv3416(WhiB3)

Rv2175c, Rv3416(WhiB3), Rv3833

Rv0445(SigK), Rv0823c, Rv2021c,  
Rv3416(WhiB3), Rv3678c

Rv2034, Rv3328c(SigJ), Rv3416(WhiB3),  
Rv3557c, Rv3692(MoxR2)

Rv2021c, Rv2710(SigB), Rv3133c(DevR),  
Rv3678c, Rv3164(MoxR3)

Rv0117(OxyS), Rv0445(SigK), Rv1359,  
Rv1956, Rv2745c, Rv3416(WhiB3),  
Rv3692(MoxR2)

Rv0445(SigK), Rv1359, Rv2034,  
Rv3133c(DevR), Rv3416(WhiB3)

Rv0117(OxyS), Rv0491(RegX3), Rv1956,  
Rv2021c, Rv3414c(SigD), Rv3416(WhiB3)

Rv0445(SigK), Rv0818, Rv1956, Rv2017,  
Rv2034, Rv3416(WhiB3)

Rv0445(SigK), Rv0823c, Rv1931c, Rv1956,  
Rv2175c, Rv3334, Rv3416(WhiB3)

**Target gene or gene cluster**

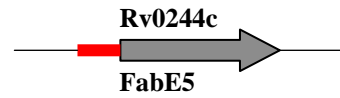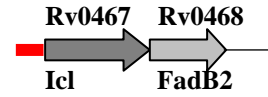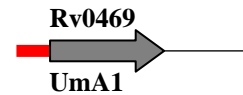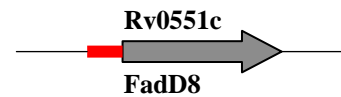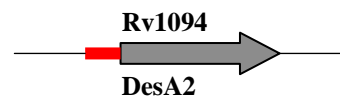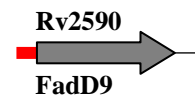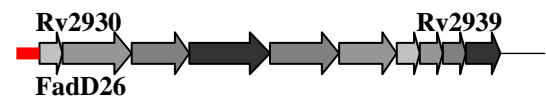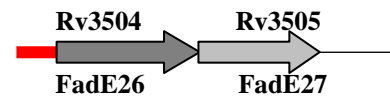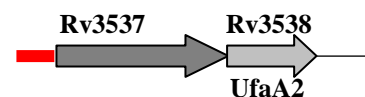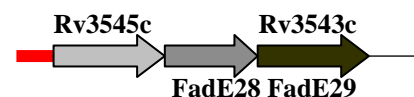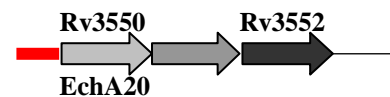

**Detection of novel transcription factors for the expression of fatty acid metabolism genes by one-hybrid system.** The promoters of fatty acid metabolism genes were cloned in pBXcm-T and used to screen the *M. tuberculosis* sub-genomic library according to the description in *Materials and Methods*. The potential regulators which interact with the promoters were isolated from the library and were listed on the left panel. Rv3416 (WhiB3) was underlined. The structures of the fatty acid metabolism gene or gene cluster were listed in the right, respectively.
