# Supplementary material for: Dissecting transcription regulatory pathways through a new bacterial one-hybrid reporter system
Source: HighWire-hosted journal article supplement (doi:10.1101/gr.086595.108), 2009-02-18
Supplement: Supp_Fig_4.pdf [file Supp_Fig_4.pdf]

**Figure 4**

**A**

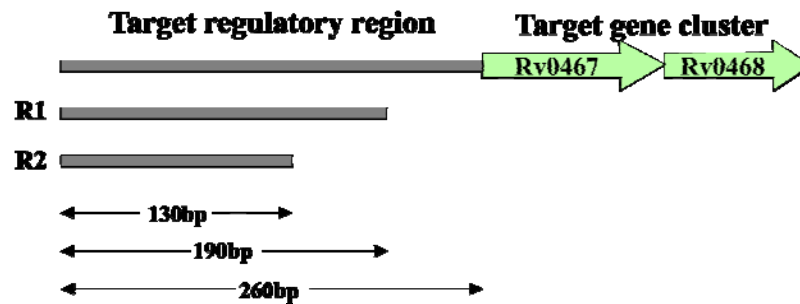

**B**

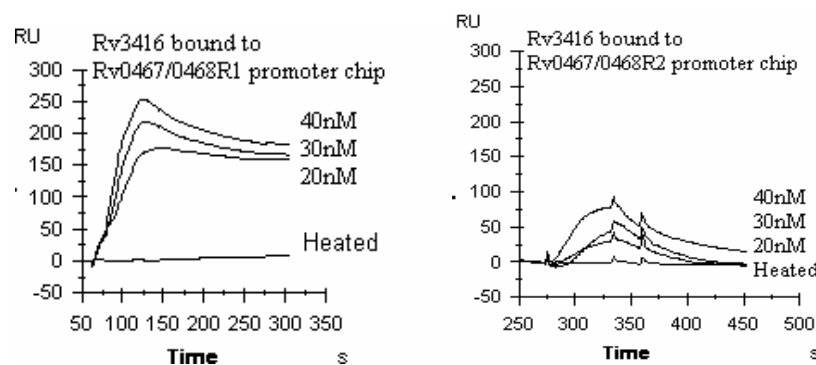

**C**

Rv0467-0468 GTGG-ACCAGCGTTGACACGCTGTG-CCATGGTCGA--CTTAGCACACCAGTGAA-GCTGCGCG  
Rv0053-0060 GTCCAGGGCTCTGTGTAGCCTGG--GCGAGTTGCCGACGCAGGCGACCCCTCTG-CCA-CGGAT  
Rv0244c ATAGCGATCAAATGAAGAATATGCG--GAGT-CTAGGGCGGAGCGCTGGCAGCGTA-GATCAT  
Rv0350-0351 GCGGAACAAGACCCG-CACGACCAGCGTTAGC-ATGCTCAGTAAGTTGAGTGCATCAGGCTCA-  
Rv0469 --GTCCAGGTTTCTACACGTACTGAAGTGTATGA-ACGCCCCCA--GGCTTG-ACGCAAGGCGA  
Rv0551c CCTCGTAATCTCGAAGGATC-----A-CTACGCTTGGAGCCATGGCCGATGC-AGACCT  
Rv0757-0758 GTCCGAATACCCACGAGGGTTTGG--CCGAGGTTTCATTCTGGAGTGTATTACG-GCG-CGCG  
Rv1094 CTGGCCAGGGCGTTTC-----CGCT---CTACGACGGGCTCGAGGAGTGGAGTCTGGTCGG-CC  
Rv1460-1466 GCGC-GCCAGCGC-GGTGAGCTCGG-TAGTGGTCAGCGGTGACCCACCGCCTGC-TCGTCCGCA  
Rv2031 TCACCA-TGGTGTCCGGCATGATCAACCTCCGCTGTTCGATATCACCCGATCTTTCTGAACGGC  
Rv2735c-273 TTCC-GCCTACTGTGGTGATCATTCGGAGCAGCCGACTTGT-CAGTGGCTGTCTCTAGTGTCAAGG  
Rv2875 CTTGAGGTGCGGCCAGCAAGGGGCTACA-GGTTTTTTCCTTCACCTACGGATGAA-T--ATC-C  
Rv2930-2939 CTGCGCTGCG--CAGACATGCTGCGGAA-GCAGAAGTCCGTAATCGTCAGGTGGC-TT-GGT-C  
Rv3197A GTCA-ATCACCGCGGGCCGCCCTCCTCTCGTGTGCGG--CGGGTTGCCAGCCCC-CCAATGCCA  
Rv3417c-341 ACGCGCGAGGGCGCG-GACGA---ATGCCGAA-TCACCTGGTAATTCGGACGGTTCCGGGGAC  
Rv3504-3505 TTGCGCTTGGCGTTGGTTGTGACAGC--TAGTGGACGCTGCTGACGGCCAGTGATAAAGAGCG  
Rv3537-3538 GCCA--GTAGCGGCCGACCCGAGCAATTCTA-TAACGTGTTCTACA-TGACTGTGCAGGAGTTCG  
Rv3543c-354 TCATCGTTGAAGCCACCCGC-AGC---CCCATCGGCAACGCAACGGATGGC-TGTCGG-GG-CT  
Rv3550-3552 ATCAGGCTCCGCGCTGTTGCGCGAATACCGAGCTGATGC-CGCGCCTACCCCGCG-GACAAGC  
Rv3864-3871 TCACCA-AAAAATTCG-TGCACCAACCCCTCCGAGCGCTGCTAAGCTCAATGTGAGTGCAAA  
Rv3876-3877 CAGGCAATGGCTTCGACCGAAGGCAACGCTACTGGGATGTTGGCATAGGGCAACGCCGAGTTGCG

**Interaction between WhiB3 and the regulatory region of Rv0467/Rv0468 gene cluster. (A)** Schematic diagrams of different deleted mutants of the regulatory region. Two mutant regulatory regions R1 and R2 were cloned into the reporter vector of pBTXcm-T, respectively. R2 is shorter than R1 which contains an additional 60-bp region. **(B)** SPR assays for the interactions between WhiB3 and the regulatory region of Rv0467/Rv0468 gene cluster. Two truncated DNA fragments, R1 and R2, were immobilized on the SA chip and SPR assays were conducted to further map the binding region of WhiB3 within the regulatory sequences. An about 60-bp region was shown to

contain potential target site due to a significantly reduced binding signal of WhiB3 detected on the shorter fragment of R2, which lost the 60-bp region. (C) A blast assay for searching the potential binding site of WhiB3. A non-conserved DNA-binding motif, TNGCGTNNCGC, was defined within the regulatory sequences of targets genes detected by the bacterial one-hybrid system.
